# Supplementary material
Source: PubMed Central journal article supplement (PMC3241797)
Supplement: 1116819108_pnas.201116819SI.pdf [file 1116819108_pnas.201116819SI.pdf]

# Supporting Information

Lombardi et al. 10.1073/pnas.1116819108

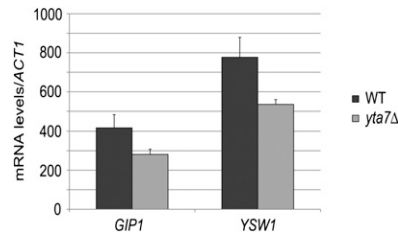

**Fig. S1.** Decreased mid-late meiotic gene induction without Yta7. RT-qPCR analysis of cDNA from SK1 WT and *yta7Δ* homozygotes. Cells were collected after 8 h in sporulation medium containing 1% potassium acetate. Values were normalized to *ACT1* and are relative to transcript levels in YPAcetate.

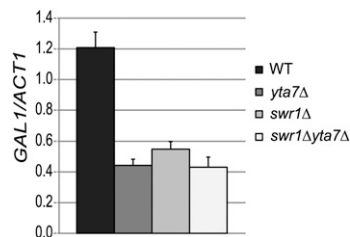

**Fig. S2.** Yta7 and H2A.Z functioned together for proper *GAL1* gene induction. RT-qPCR analysis of *GAL1* transcript levels after 1 h with galactose. *GAL1* gene induction was assayed in cells lacking both Yta7 and Swr1, the catalytic subunit of the H2A.Z deposition complex. The *swr1Δ* mutant was used in lieu of the *htz1Δ* mutant, because the *htz1Δ* mutant exhibits phenotypes due to both the loss of H2A.Z and problematic Swr1 activity in the absence of H2A.Z (1, 2). Cells were pregrown in YPRaffinose (2%, non-inducing).

- Halley JE, Kaplan T, Wang AY, Kobar MS, Rine J (2010) Roles for H2A.Z and its acetylation in *GAL1* transcription and gene induction, but not *GAL1*-transcriptional memory. *PLoS Biol* 8: e1000401.
- Morillo-Huesca M, Clemente-Ruiz M, Andújar E, Prado F (2010) The SWR1 histone replacement complex causes genetic instability and genome-wide transcription misregulation in the absence of H2A.Z. *PLoS ONE* 5:e12143.

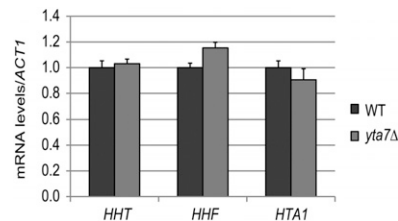

**Fig. S3.** Little or no changes to histone transcript levels in the *yta7Δ* mutant. RNA analysis was performed on asynchronously growing cells. *HHT* and *HHF* primer sets detect total H3 and H4 transcripts, respectively, whereas *HTA1* primers are specific to the H2A transcripts from the "copy 1" locus.

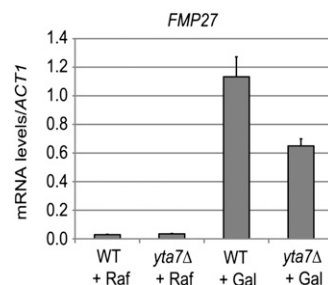

**Fig. S4.** Yta7 was required for proper *pGAL1::FMP27* induction. RT-qPCR analysis of *FMP27* transcript levels in raffinose (Raf; 2%, non-inducing) and after 1 h with galactose (Gal; 2%, inducing). The level of each transcript was normalized to *ACT1* mRNA levels. The error bars represent the SEM for four biological replicates.

**Table S1. Genes significantly affected in the *yta7Δ* mutant**

| ID        | Name      | Fold change  |
|-----------|-----------|--------------|
| REP1_2UM  | REP1_2UM  | 0.18         |
| REP2_2UM  | REP2_2UM  | 0.20         |
| FLP_2UM   | FLP_2UM   | 0.21         |
| YDL227C   | HO        | 0.46         |
| YDR428C   | BNA7      | 0.49         |
| YHR057C   | CPR2      | 0.50         |
| YHR029C   | YHI9      | 0.54         |
| YFR012W   | YFR012W   | 0.56         |
| YHR015W   | MIP6      | 0.56         |
| YAL067C   | SEO1      | 0.56         |
| YIR030C   | DCG1      | 0.57         |
| YFL053W   | DAK2      | 0.58         |
| YNL335W   | YNL335W   | 0.60         |
| YDR369C   | XRS2      | 0.60         |
| YGR201C   | YGR201C   | 0.60         |
| YJR025C   | BNA1      | 0.61         |
| YGR259C   | YGR259C   | 0.61         |
| YMR182C   | RGM1      | 0.61         |
| YNL012W   | SPO1      | 0.61         |
| YHR067W   | HTD2      | 0.61         |
| YOL141W   | PPM2      | 0.1          |
| YDR539W   | YDR539W   | 0.61         |
| YEL030W   | ECM10     | 0.61         |
| YHL022C   | SPO11     | 0.62         |
| YIL037C   | PRM2      | 0.62         |
| YIL015C-A | YIL015C-A | 0.62         |
| YJL028W   | YJL028W   | 0.62         |
| YGL104C   | VPS73     | 0.62         |
| YIL089W   | YIL089W   | 0.63         |
| YDR070C   | YDR070C   | 0.64         |
| YKL114C   | APN1      | 0.64         |
| YPL278C   | YPL278C   | 0.64         |
| YGR169C   | PUS6      | 0.64         |
| YKL053C-A | MDM35     | 0.64         |
| YPL277C   | YPL277C   | 0.64         |
| Ty class* | Ty class* | 0.65 ± 0.036 |
| YER138W-A | YER138W-A | 0.65         |
| YML079W   | YML079W   | 0.65         |
| YGR122C-A | YGR122C-A | 0.65         |
| YOR338W   | YOR338W   | 0.66         |
| YGL258W   | VEL1      | 0.66         |
| YGL259W   | YPS5      | 0.66         |
| YPL165C   | SET6      | 0.66         |
| YBR045C   | GIP1      | 0.66         |
| YOR295W   | UAF30     | 0.66         |
| YGL027C   | CWH41     | 0.67         |
| YBR013C   | YBR013C   | 0.67         |
| YDL195W   | SEC31     | 0.67         |
| YBR261C   | YBR261C   | 0.67         |
| YDR258C   | HSP78     | 0.67         |
| YFL059W   | SNZ3      | 0.68         |
| YDR285W   | ZIP1      | 0.68         |
| YMR315W-A | YMR315W-A | 0.68         |
| YOL160W   | YOL160W   | 0.68         |
| YER093C-A | YER093C-A | 0.68         |
| YIL073C   | SPO22     | 0.68         |
| YNR064C   | YNR064C   | 0.69         |
| YBL098W   | BNA4      | 0.69         |
| YFR023W   | PES4      | 0.69         |
| YJL089W   | SIP4      | 0.69         |
| YGL240W   | DOC1      | 0.69         |
| YDR493W   | YDR493W   | 0.69         |
| YDR336W   | YDR336W   | 0.70         |



Table S1. Cont.

| ID        | Name       | Fold change |
|-----------|------------|-------------|
| YBR192W   | RIM2       | 0.80        |
| YGR091W   | PRP31      | 0.80        |
| YDL030W   | PRP9       | 0.80        |
| YPL216W   | YPL216W    | 0.80        |
| YDL108W   | KIN28      | 0.81        |
| YKL165C   | MCD4       | 1.27        |
| YDR421W   | ARO80      | 1.30        |
| YMR147W   | YMR147W    | 1.32        |
| YFR018C   | YFR018C    | 1.33        |
| YER179W   | DMC1       | 1.34        |
| YOL110W   | SHR5       | 1.34        |
| YFR020W   | YFR020W    | 1.35        |
| YHR095W   | YHR095W    | 1.35        |
| YML100W-A | YML100W-A  | 1.36        |
| YMR319C   | FET4       | 1.36        |
| YPR053C   | YPR053C    | 1.37        |
| YGR225W   | AMA1       | 1.38        |
| YIL162W   | SUC2       | 1.39        |
| YJR094C   | IME1       | 1.39        |
| YJL212C   | OPT1       | 1.40        |
| YGR203W   | YGR203W    | 1.40        |
| YJL217W   | YJL217W    | 1.42        |
| YGR280C   | PXR1       | 1.42        |
| YBR072C-A | YBR072C-A  | 1.42        |
| YJL133C-A | YJL133C-A  | 1.43        |
| YDR100W   | TVP15      | 1.44        |
| YBL012C   | YBL012C    | 1.44        |
| YCR024C-A | PMP1       | 1.44        |
| YCL042W   | YCL042W    | 1.45        |
| YHL026C   | YHL026C    | 1.46        |
| YOR383C   | FIT3       | 1.46        |
| YNL145W   | MFA2       | 1.46        |
| YJR115W   | YJR115W    | 1.47        |
| YGR050C   | YGR050C    | 1.47        |
| YAR028W   | YAR028W    | 1.47        |
| YGR279C   | SCW4       | 1.48        |
| YBR182C-A | YBR182C-A  | 1.48        |
| YPR013C   | YPR013C    | 1.48        |
| YBR183W   | YPC1       | 1.49        |
| YNL015W   | PBI2       | 1.50        |
| YGL089C   | MF(ALPHA)2 | 1.53        |
| YBR044C   | TCM62      | 1.56        |
| YDR033W   | MRH1       | 1.56        |
| YGR271W   | SLH1       | 1.56        |
| YPL092W   | SSU1       | 1.58        |
| YDL048C   | STP4       | 1.58        |
| NTS2-1    | NTS2-1     | 1.59        |
| YJL037W   | IRC18      | 1.62        |
| NTS1-2    | NTS1-2     | 1.63        |
| YOR318C   | YOR318C    | 1.64        |
| YGR146C-A | YGR146C-A  | 1.64        |
| YBR147W   | YBR147W    | 1.66        |
| YGL158W   | RCK1       | 1.67        |
| YJL150W   | YJL150W    | 1.68        |
| YDR342C   | HXT7       | 1.69        |
| YJR004C   | SAG1       | 1.69        |
| YJL079C   | PRY1       | 1.70        |
| YBR092C   | PHO3       | 1.71        |
| YGR268C   | HUA1       | 1.73        |
| YNL160W   | YGP1       | 1.76        |
| YKR041W   | YKR041W    | 1.76        |
| YHR022C-A | YHR022C-A  | 1.77        |

Table S1. Cont.

| ID        | Name      | Fold change |
|-----------|-----------|-------------|
| YDL185W   | TFP1      | 1.77        |
| YDR034W-B | YDR034W-B | 1.85        |
| YBR019C   | GAL10     | 1.86        |
| YBL013W   | FMT1      | 1.88        |
| YMR101C   | SRT1      | 1.96        |
| YNL066W   | SUN4      | 1.98        |
| YIL011W   | TIR3      | 2.01        |
| YOL047C   | YOL047C   | 2.15        |
| YFR035C   | YFR035C   | 2.20        |
| YHR079C-A | SAE3      | 2.26        |
| YGR269W   | YGR269W   | 3.19        |

\*Forty-five Ty class transposons were decreased  $0.65 \pm 0.04$ .

Table S2. Strains used

| Strain                   | Genotype                                                                                                             | Source                             |
|--------------------------|----------------------------------------------------------------------------------------------------------------------|------------------------------------|
| W303-1a                  | <i>MAT<math>\alpha</math> ade2-1; can1-100; his3-11; leu2-3,112; trp1-1; ura3-1</i> (alias JRY3009)                  | R. Rothstein (Columbia University) |
| JRY7754                  | <i>MAT<math>\alpha</math> htz1<math>\Delta</math>::HIS3MX</i>                                                        | Kobor et al. (1)                   |
| JRY7972                  | <i>MAT<math>\alpha</math> HTZ1-FLAG::kanMX</i>                                                                       | Babiarz et al. (2)                 |
| JRY8689                  | <i>MAT<math>\alpha</math> HTZ1-FLAG::kanMX YTA7-TAP::TRP1</i>                                                        | This study                         |
| JRY9199                  | <i>MAT<math>\alpha</math> HTZ1-FLAG::kanMX yta7<math>\Delta</math>::natMX</i>                                        | This study                         |
| JRY9200                  | <i>MAT<math>\alpha</math> yta7<math>\Delta</math>::natMX</i>                                                         | This study                         |
| JRY9201                  | <i>MAT<math>\alpha</math>; pRS316</i>                                                                                | This study                         |
| JRY9202                  | <i>MAT<math>\alpha</math> yta7<math>\Delta</math>::natMX; YTA7/pRS316</i>                                            | This study                         |
| JRY9203                  | <i>MAT<math>\alpha</math> yta7<math>\Delta</math>::natMX; yta7K460A/pRS316</i>                                       | This study                         |
| JRY9204                  | <i>MAT<math>\alpha</math> yta7<math>\Delta</math>::natMX; yta7E519Q/pRS316</i>                                       | This study                         |
| JRY9205 and 9206         | <i>MAT<math>\alpha</math> (hht1-hhf1)<math>\Delta</math>::HygMX</i>                                                  | This study                         |
| JRY9207 and 9208         | <i>MAT<math>\alpha</math> yta7<math>\Delta</math>::natMX (hht1-hhf1)<math>\Delta</math>::HygMX</i>                   | This study                         |
| JRY9209 and 9210         | <i>MAT<math>\alpha</math> HIS3MX-pGAL1::FMP27 RPB3-3HA::TRP1</i>                                                     | This study                         |
| JRY9211 and 9212         | <i>MAT<math>\alpha</math> HIS3MX-pGAL1::FMP27 RPB3-3HA::TRP1 yta7<math>\Delta</math>::natMX</i>                      | This study                         |
| JRY9213                  | <i>MAT<math>\alpha</math> HTZ1-FLAG::kanMX HIS3MX-pGAL1::FMP27</i>                                                   | This study                         |
| JRY9214                  | <i>MAT<math>\alpha</math> HTZ1-FLAG::kanMX HIS3MX-pGAL1::FMP27 YTA7-TAP::TRP1</i>                                    | This study                         |
| JRY9215                  | <i>MAT<math>\alpha</math> YTA7-TAP::TRP1</i>                                                                         | This study                         |
| JRY9216 and 9217         | <i>MAT<math>\alpha</math> HIS3MX-pGAL1::YTA7-TAP::TRP1 HTZ1-FLAG::kanMX</i>                                          | This study                         |
| JRY9218                  | <i>MAT<math>\alpha</math> HTZ1-FLAG::kanMX swr1<math>\Delta</math>::HIS3MX</i>                                       | This study                         |
| JRY9219 and 9220         | <i>MAT<math>\alpha</math> HTZ1-FLAG::kanMX swr1<math>\Delta</math>::HIS3MX yta7<math>\Delta</math>::natMX</i>        | This study                         |
| For sporulation analysis |                                                                                                                      |                                    |
| SK-1                     | <i>MAT<math>\alpha</math>/<math>\alpha</math> ho::LYS2 lys2 ura3</i> (alias JRY2692)                                 | N. Kleckner (Harvard University)   |
| JRY9223                  | <i>MAT<math>\alpha</math>/<math>\alpha</math> ho::LYS2 lys2 ura3 yta7<math>\Delta</math>::natMX</i>                  | This study                         |
| For Fig. 2D              | Derived from DDY277 and DDY282 (3); all <i>ADE2 his3 leu2 lys2<math>\Delta</math> trp1 ura3</i>                      |                                    |
| JRY9224                  | <i>MAT<math>\alpha</math> HMRI<math>\Delta</math>; pRS316</i>                                                        | This study                         |
| JRY9225                  | <i>MAT<math>\alpha</math> HMRI<math>\Delta</math>-E-Boundary-a1; pRS316</i>                                          | This study                         |
| JRY9226                  | <i>MAT<math>\alpha</math> HMRI<math>\Delta</math>-E-Boundary-a1 yta7<math>\Delta</math>::kanMX; pRS316</i>           | This study                         |
| JRY9227 and 9228         | <i>MAT<math>\alpha</math> HMRI<math>\Delta</math>-E-Boundary-a1 yta7<math>\Delta</math>::kanMX; YTA7/pRS316</i>      | This study                         |
| JRY9229                  | <i>MAT<math>\alpha</math> HMRI<math>\Delta</math>-E-Boundary-a1 yta7<math>\Delta</math>::kanMX; yta7K460A/pRS316</i> | This study                         |
| JRY9230                  | <i>MAT<math>\alpha</math> HMRI<math>\Delta</math>-E-Boundary-a1 yta7<math>\Delta</math>::kanMX; yta7E519Q/pRS316</i> | This study                         |

1. Kobor MS, et al. (2004) A protein complex containing the conserved Swi2/Snf2-related ATPase Swr1p deposits histone variant H2A.Z into euchromatin. *PLoS Biol* 2:E131.
2. Babiarz JE, Halley JE, Rine J (2006) Telomeric heterochromatin boundaries require NuA4-dependent acetylation of histone variant H2A.Z in *Saccharomyces cerevisiae*. *Genes Dev* 20:700–710.
3. Jambunathan N, et al. (2005) Multiple bromodomain genes are involved in restricting the spread of heterochromatic silencing at the *Saccharomyces cerevisiae* HMR-tRNA boundary. *Genetics* 171:913–922.

**Table S3. Primers used**

|                              |                                                                                                                              |
|------------------------------|------------------------------------------------------------------------------------------------------------------------------|
| Strain construction          |                                                                                                                              |
| <i>yta7</i> KO               | TCTCTTCTCGCTATTTATTCACAATTGGTGCAGAAAGAACC GGATCCCCGGGTTAATTA<br>AACTACATTTAAGAATTATATAAACATTATGGACTCCTGCCGATGAATTCGAGCTCGTTT |
| <i>YTA7</i> cloning          | TGGCGCCGCTCTAGAACTAGTGGATCCCCCGGGCTGCAG TGCTGAGTTTGAGATGTTTT<br>CTGGGTACCGGGCCCCCTCGAGGTGACGGTATCGATCGGCTATTGATGGTACGGATC    |
| <i>yta7K460A</i>             | CCTCCTGGTACGGGTGCAACACTTATGGCAAG<br>CTTGCCATAAGTGTGACCCGTACCAGGAGG                                                           |
| <i>yta7E519Q</i>             | CTTCATCATTTTTTTGATCAAATCGACGGATTAGCGCC<br>GGCGTAATCCGTCGATTTGATCAAAAAAATGATGGAAG                                             |
| <i>YTA7-TAP</i>              | AACAGGAACTGTCGATGAAATAATAAAATTTTTATCTGAATCCATGAAAAAGAGAAG<br>AACTACATTTAAGAATTATATAAACATTATGGACTCCTGCTACGACTCACTATAGGG       |
| ( <i>hht1-hhf1</i> ) KO      | ATATTTGCTTGTGTTACCGTTTTCTAGAATTAGCTAAACGGATCCCCGGGTTAATTA<br>TTTTGTTGTTTTTACTAAAACCTGATGACAATCAACAAACGATGAATTCGAGCTCGTTT     |
| <i>pGAL1::FMP27</i>          | AAGAACGGTAGCTATTACAAAGGACAGTAAAAGCAAACAGGAATTCGAGCTCGTTAAAC<br>ATATAAGCCACTTGTACAGTAGAACATTAATCGGAAACATCATTTTGAGATCCGGGTTTT  |
| <i>RPB3-HA</i>               | AATGGGTAATACTGGATCAGGAGGGTATGATAATGCTTGGCGGATCCCCGGGTTAATTA<br>GTTCACTTGTTTTTTCTCTATTACGCCCACTTGAGAAGAATTCGAGCTCGTTAAAC      |
| <i>pGAL1::YTA7</i>           | CCCATTGTTGTTTTCGACAGTCATAAAAAAGGTTACCACGAATTCGAGCTCGTTAAAC<br>CTTCAACGTCGCTACCGCTCTATTCTTAAATTCGTGCCATTTTGAGATCCGGGTTTT      |
| qPCR, listed in order of use |                                                                                                                              |
| <i>SPO1</i>                  | GAC AAC TAT CCA AAC GGC TCC AAG<br>CCA GTG GGT AAC ATA CTG CTA ACT                                                           |
| <i>ZIP1</i>                  | AAGTGTCTAAGGTGGATCATATAAG<br>GAA GGG TTG GTT AAC TCT AGG TC                                                                  |
| <i>GIP1</i>                  | CAC ATT TCG CGG CCT TAC TAA TA<br>TGAGTACTCCGATCCTTTATACA                                                                    |
| <i>PXA1</i>                  | TTGGCTAACTTACCTAGATGCCAT<br>CGT TGT CAA TCG ACG TGA TTG C                                                                    |
| <i>FOX2</i>                  | ATA TCG ATC CCA CGC TAG CCA A<br>TAC AGC GGC GTT ATC CAA TAC A                                                               |
| <i>ACT1</i>                  | TGTCCTGTACTCTCCGGT<br>CCGGCAAATCGATTCTCAA [described by Babiarz et al. (1)]                                                  |
| <i>SPO11</i>                 | CCT ATG GGA TTA GCA TAG CCC TA<br>TGTTGGCAGTCAGAGATGCTATC                                                                    |
| <i>YSW1</i>                  | ACCTGCTGTAGTGCCTAAACA<br>GGC AGA TCT CTC GTA GAA CCT                                                                         |
| <i>GAL1 +1,400</i>           | TGGATCATATGGTCCCGTTTGAC<br>GGT ACT TGA CCT TGT AGA ACT CAT TG                                                                |
| <i>GAL10 +1,865</i>          | CTACAAA GCCAACGGTC TTAGGC<br>CTTGCTTCGTAACCAGCAGACAA                                                                         |
| <i>PRP8</i>                  | GAGTGTGGCTAAATTTCTAAGAGG<br>TCGAATACTCTCAGGCATATTTCT [described by Babiarz et al. (1)]                                       |
| <i>GAL10 +535</i>            | CCT TAG GGC CTA CTA ATC CGT A<br>AGAGGGATGTGCGCAATTG                                                                         |
| <i>GAL10 +114</i>            | GGT TAC AGG TGG TGC TGG ATA C<br>GAT GCT TGG TCA AGA CCT CTA A                                                               |
| <i>GAL1 Prom</i>             | AAGTACGGATTAGAAGCCGCC<br>GGCCAGGTTACTGCCAATTT                                                                                |
| <i>GAL1 +97</i>              | CTGAGTTCAATTCTAGCGCAAAGG<br>CTCTACCAGGCGATCTAGCAACAA                                                                         |
| <i>GAL1 +756</i>             | CTCTGTTTGCAGTGGAGGAAGATCA<br>CAGCTGTAGTACTTCTACCCTC                                                                          |
| <i>GAL7 -326</i>             | AGCAGGAGCC GCGGAGTTCA T<br>GATCACGGTCAACAGTTGTCCGAG                                                                          |
| <i>GAL7 +217</i>             | GGTTAGG TCAACAGGAG GCTG<br>AGATTGCACTTTAAGCAGCCTATT                                                                          |
| <i>SUC2 -317</i>             | ATACG CGTAGCGTTA ATCGACC<br>TAC TAT AGA GCC CTT AGG CAA CAT                                                                  |
| <i>SUC2 +69</i>              | CACTAACGTATATGATGCTTTTGCA<br>TTT CAT CGT ACC ACA ACC CAT T                                                                   |
| <i>SUC2 +564</i>             | AGCTGCCAACTCCACTCAATTC<br>TTG GCA AAT GCA GAT TCT AGC TT                                                                     |
| <i>ADY3</i>                  | AAT TAC TGA CGA GTT AGC TGG AAA<br>TGCGATTGCACATAGGTAAGGTC                                                                   |

Table S3. Cont.

|                      |                                                                                                                         |
|----------------------|-------------------------------------------------------------------------------------------------------------------------|
| <i>HHT</i>           | GGT GGT GTT AAG AAG CCT CA<br>CTT GAG CGA TTT CTC TGA CC                                                                |
| <i>HHF</i>           | AGC TAG AAG AGG TGG TGT CA<br>TCTTTCTCTGGCGTGTTTCG                                                                      |
| <i>HTA1</i>          | ACGTTACCATTGCCCAAGG<br>GTTTAGTTCCTTCCGCCTTC [described by Fillingham et al. (2)]                                        |
| <i>GAL10 +1,092</i>  | CAG ACC GAG TTG CAG GTT GAA GAC<br>CAACAATGCTGGCGCCCAAATTG                                                              |
| ORF-free Chr I       | GTT TAT AGC GGG CAT TAT GCG TAG ATC AG<br>GTT CCT CTA GAA TTT TTC CAC TCG CAC ATT C [described by Mason and Struhl (3)] |
| <i>pGAL1::FMP27</i>  | CTGGGGTAATTAATCAGCGAAGCGATG<br>CAGTTGTACAGTAGAACATTAATCGGAAAC [described by Mason and Struhl (3)]                       |
| <i>FMP27, 0.5 kb</i> | CGCAATTAGTCAACAACGATATCACGATTG<br>CCTACTTGAAGTCCATCCTTCAGAGG [described by Mason and Struhl (3)]                        |
| <i>FMP27, 2 kb</i>   | CATATCATCCACCCTAGGTGCTAGGTCGG<br>GAGCTGACCAGACCTAACCATAGTAGCGTG [described by Mason and Struhl (3)]                     |
| <i>FMP27, 4 kb</i>   | AGATATTACTCGTTGTTTCGTGCCAG<br>TCCCAAACCCTAGTTTAACAGAAGG [described by Jimeno-Gonzalez et al. (4)]                       |
| <i>FMP27, 6 kb</i>   | CGTACTGTTGAAATGGAACGAGGACGC<br>ATCGCTTCCATACTCGTTGTATCATCAGTC [described by Mason and Struhl (3)]                       |
| <i>FMP27, 8 kb</i>   | GAGGGTCACA GATCTATTAC TTGCC<br>GTTGTGAGTTGCTTCAGTGGTGAAGTG [described by Mason and Struhl (3)]                          |

Chr, chromosome; Prom, promoter.

1. Babiarz JE, Halley JE, Rine J (2006) Telomeric heterochromatin boundaries require NuA4-dependent acetylation of histone variant H2A.Z in *Saccharomyces cerevisiae*. *Genes Dev* 20: 700–710.
2. Fillingham J, et al. (2009) Two-color cell array screen reveals interdependent roles for histone chaperones and a chromatin boundary regulator in histone gene repression. *Mol Cell* 35: 340–351.
3. Mason PB, Struhl K (2005) Distinction and relationship between elongation rate and processivity of RNA polymerase II in vivo. *Mol Cell* 17:831–840.
4. Jimeno-Gonzalez S, Haaning LL, Malagon F, Jensen TH (2010) The yeast 5'-3' exonuclease Rat1p functions during transcription elongation by RNA polymerase II. *Mol Cell* 37:580–587.
